# Supplementary material for: Approximating the Nuclear Binding Energy Using Analytic Continued Fractions
Source: Research Square preprint supplement (doi:10.21203/rs.3.rs-3703198/v1), 2023-12-13
Supplement: Supplementary file 1 [file 5e9c2ca37d3c2c83d5432a6d.pdf]

## Supplementary Material

### Upper and lower boundaries models

The upper and lower boundary models developed using the continued fraction method are expressed below, where  $A$  is the atomic mass number. The general form of a bound CF is expressed as,

$$\left(\frac{B(A)}{A}\right)_X = g_0(A)_X + \frac{h_0(A)_X}{g_1(A)_X}, \quad (\text{S1})$$

where  $X \in \{LB, UB\}$  is one of two possible labels indicating if we are referring to a lower or upper bound (respectively  $LB$ ,  $UB$ ). Accordingly, for the upper bound we have Supplementary Eqs. (S2) below:

$$\begin{aligned} g_0(A)_{UB} &= \frac{1481}{158} - \frac{1}{109}A, \\ h_0(A)_{UB} &= \frac{54369}{148} - \frac{873}{134}A, \\ g_1(A)_{UB} &= -\frac{16351}{308} - \frac{20914}{1973}A, \end{aligned} \quad (\text{S2})$$

and for the lower bound Supplementary Eqs. (S3):

$$\begin{aligned} g_0(A)_{LB} &= \frac{451}{10740}A^{\frac{1}{3}} - \frac{871}{11709}A^{-\frac{1}{3}} + \frac{25}{1092}, \\ h_0(A)_{LB} &= \frac{70}{4699}A^{\frac{1}{3}} + \frac{322}{21897}A^{-\frac{1}{3}} - \frac{419}{45192}, \\ g_1(A)_{LB} &= \frac{17}{3278}A^{\frac{1}{3}} + \frac{428}{5699}A^{-\frac{1}{3}} - \frac{79}{2470}. \end{aligned} \quad (\text{S3})$$

**Empirical approximation for  $T(Z)$** 

Additionally, an empirical approximation for  $T(Z)$  is given here. We can denote it as  $T_a(Z)$  and it is given by:

$$T_a(Z) = k^{\gamma(Z)} \quad (\text{S4})$$

where  $k = 11591/547$  is a constant and  $\gamma(Z) = 4/(6 - 11\sqrt{Z})$ . This expression was first found by one of the authors using the academically publicly available symbolic regression package Eureka in early 2020, further improved by non-linear optimization, and it is also discussed in<sup>7</sup>. It was found using the ansatz of a possible simple dependence of  $T(Z)$  on the square root of the number of electrons, which finally led to a mathematical expression with significantly low complexity. See<sup>7</sup> for other approximations.

If instead of the tabulated data for the optimal solution of the Thomson Problem an analytical formula is needed, we have recomputed the value of  $f(A)$  and we produced the following approximation:

$$\frac{B(Z,A)}{A} = (1 + \delta(N,Z)) \left( \frac{A^2 - 1336A + 6800}{182(5-A)} \right) \left( \frac{Z}{A} + T_a(Z) \right) \quad (\text{S5})$$

again with  $\delta_0 = 1/(2A)$ .

## Results Dataset 1 testing subset

In this section, we present the results for the Dataset 1 testing subset considering all nuclides and also for  $A \geq 8$  due to specific features of lighter nuclides, like deuterium and  ${}^1_2\text{He}$  (both included in the Dataset 1 testing subset). Supplementary Table S1 compares the MSE of LDM and 4 different models proposed in this work and in Ref.<sup>4</sup> for the training task and for the testing task, where both the complete and the restricted subset ( $A \geq 8$ ) are informed. Supplementary Figure S1 shows the residuals of the models included in Supplementary Table S1.

It is possible to verify that  $\text{cf-r}$  model had the best result for the training subset, but it demonstrates a poor performance for the complete testing subset that includes deuterium and  ${}^1_2\text{He}$ , more specifically for the  ${}^1_2\text{He}$  whose approximation absolute residual is 35.48. For the restricted testing subset, the  $\text{cf-r}$  model approximates as well as LDM, where LDM's MSE is  $1.5 \times 10^{-5}$  better than  $\text{cf-r}$  model's MSE. The approximation from both models and also the approximation from the data-driven model proposed in Ref.<sup>4</sup> can be observed through the representation of the residuals (in MeV) in Supplementary Figure S1a, whilst Supplementary Figure S1b shows the residuals of the approximation of LDM and both Thomson-related (with and without parity) models.

Exploring the results of  $\text{cf-r}$  obtained throughout all 100 runs, Supplementary Fig. S2 represents the average residual (in MeV) and the standard deviation for each nuclide in the training subset (see Supplementary Fig. S2a) and testing subset with  $A \geq 8$  (see Supplementary Fig. S2b). Supplementary Figure S2a illustrates the difficult task of approximating the lighter nuclides through the larger values of the standard deviation of these nuclides. This is verified by the deuterium and  ${}^1_2\text{He}$  in the testing subset, where the average value was 2.354 and 1.914, and the standard deviation was 11.834 and 27.970, respectively.

| MSE      | LDM<br>Eq. (5)         | Thomson-related<br>Eq. (8) | Thomson-related<br>Eq. (9) | Data-driven<br>Eq. (10) | $\text{cf-r}$<br>Eq. (12) |
|----------|------------------------|----------------------------|----------------------------|-------------------------|---------------------------|
| Training | $3.180 \times 10^{-2}$ | $1.150 \times 10^{-2}$     | $7.498 \times 10^{-3}$     | $1.103 \times 10^{-2}$  | $2.519 \times 10^{-3}$    |
| Testing  | $6.079 \times 10^{-2}$ | $2.364 \times 10^{-1}$     | $1.848 \times 10^{-1}$     | $8.822 \times 10^{-2}$  | 8.569                     |
| Testing* | $2.268 \times 10^{-3}$ | $1.330 \times 10^{-2}$     | $1.738 \times 10^{-2}$     | $2.083 \times 10^{-2}$  | $2.283 \times 10^{-3}$    |

\*  $A \geq 8$ , deuterium and  ${}^1_2\text{He}$  not included.

**Supplementary Table S1.** Comparison in terms of MSE for the approximations of the 109 stable and long-lived nuclides (Dataset 1 training subset) and the remaining 145 stable nuclides of the nuclear chart (Dataset 1 testing subset). We compare the performances using LDM (Eq. (5)), Thomson-related without parity (Eq. (8)), Thomson-related with parity (Eq. (9)), data-driven model (Eq. (10)) and  $\text{cf-r}$  (Eq. (12)). After analysing the residuals, we identified that deuterium and  ${}^1_2\text{He}$  proved to be challenging to approximate by all models, based on this we also present the MSE for the testing set restricted to  $A \geq 8$ , excluding deuterium and  ${}^1_2\text{He}$ .

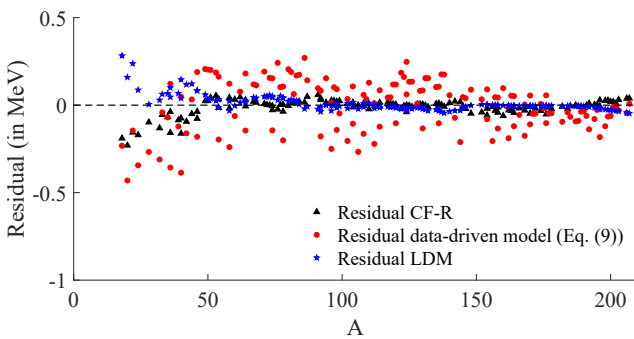

(a) Residuals of the  $\text{cf-r}$  model (Eq. (12)), the data-driven model represented in Eq. (10), and LDM (Eq. (5)).

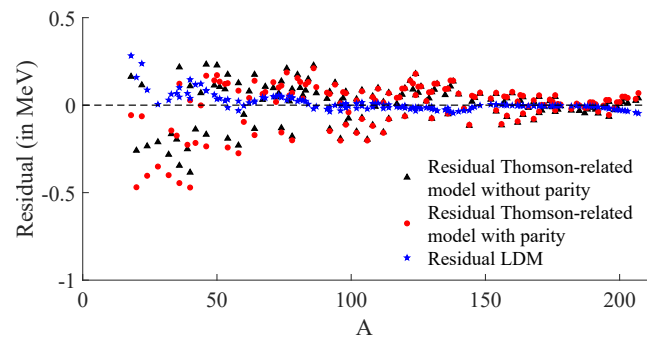

(b) Residuals of the Thomson-related models without parity (Eq. (8)) and with parity (Eq. (9)), and LDM (Eq. (5)).

**Supplementary Figure S1.** Residuals for the approximation of the 145 stable nuclides of the nuclear chart not included in the training phase with  $A \geq 8$  to improve visualization. We exclude deuterium and  ${}^1_2\text{He}$  due to their elevated residual in all models evaluated. The plots show the residual using LDM (Eq. (5)), the Thomson-related models without parity (Eq. (8)) and with parity (Eq. (9)), the data-driven model represented in Eq. (10), and the  $\text{cf-r}$  model (Eq. (12)). We highlight the good approximation obtained with  $\text{cf-r}$  (see Supplementary Fig. S1a), comparable with LDM for lighter and heavier nuclides.

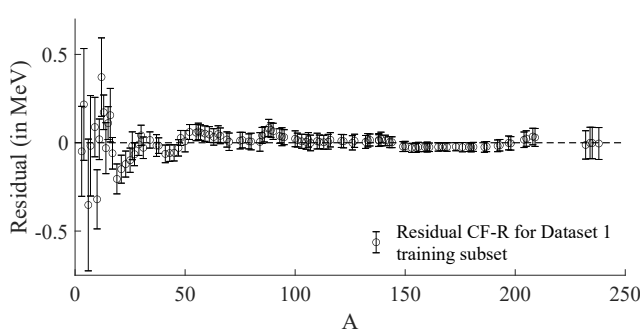

(a) Average residual and standard deviation of 109 stable and long-lived nuclides included the Dataset 1 training subset.

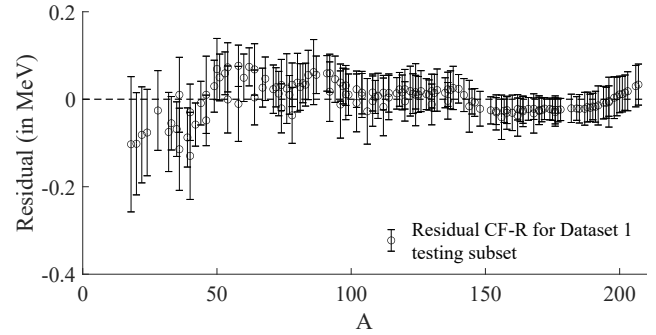

(b) Average residual and standard deviation of 145 stable nuclides with  $A \geq 8$  included in the Dataset 1 testing subset.

**Supplementary Figure S2.** Average residuals for each nuclide and its respective standard deviation for the models obtained along the 100 runs performed using `cf-r` for the 109 stable and long-lived nuclides included in the training subset (left) and the remaining 145 stable nuclides of the nuclear chart with  $A \geq 8$  included in the testing subset (right). It is possible to notice in both figures that lighter nuclides are more difficult to approximate. This fact can also be verified by deuterium and  ${}^3\text{He}$ , part of the remaining stable nuclides of the nuclear chart (testing subset). Their absolute average residual value was 2.354 MeV and 1.914 MeV, and the standard deviation was 11.834 MeV and 27.970 MeV, respectively. The heavier nuclides are better approximated by the overall `cf-r` models obtained in the 100 runs.

## Descriptive statistics of the 100 independent runs with Dataset 1 and Dataset 2

### For 109 stable isotopes - Dataset 1

Here we are investigating the effect of the value of  $\Delta$  over Dataset 1. We performed 100 different independent runs to evaluate the results of either using  $\Delta = 0$  and  $\Delta = 0.1$ . The results indicate that our approach is able to deliver reliable models. Moreover, the less complex model employing 3 features performed a bit better than the more complex model employing 5 features (see Supplementary Table S2).

| MSE       | $\Delta = 0.1$                               | $\Delta = 0$                                                                     |
|-----------|----------------------------------------------|----------------------------------------------------------------------------------|
| Max       | $3.687 \times 10^{-2}$                       | $4.879 \times 10^{-2}$                                                           |
| Mean      | $1.326 \times 10^{-2}$                       | $1.548 \times 10^{-2}$                                                           |
| Std Dev.  | $6.739 \times 10^{-3}$                       | $9.507 \times 10^{-3}$                                                           |
| Min       | $2.805 \times 10^{-3}$                       | $2.938 \times 10^{-3}$                                                           |
| Variables | 3<br>$Z^{\frac{3}{2}}, N^{-1}, \delta(N, Z)$ | 5<br>$Z^{\frac{3}{2}}, Z^{-\frac{1}{2}}, A^{-\frac{1}{2}}, N^{-1}, \delta(N, Z)$ |

**Supplementary Table S2.** Statistical analysis of the results from 100 runs performed using a *depth*<sub>1</sub> CF aiming to evaluate two different values of the parameter  $\Delta$ , used to penalise more complex models in the `cf-r`. The results show the efficiency of the method in selecting only the most meaningful features to obtain a simpler model and achieve a better approximation. Furthermore, it demonstrates that employing more variables in the model may not produce better approximations necessarily, we found a less complex model using 3 features that can outperform a more complex model using 5 features.

To illustrate the performance difference between using  $\Delta = 0$  and  $\Delta = 0.1$  in the matter of MSE, Supplementary Fig. S3 shows the box plot comparing the results obtained using both approaches. It is possible to notice that using  $\Delta = 0.1$  not only produced a smaller minimum MSE, but its variability is smaller too. According to the interquartile range, the median value of the results is smaller as well.

We also performed 10-fold cross-validation using the training subset of Dataset 1 to demonstrate the robustness of our method and to identify which nuclides are more difficult to model.

The nuclides were randomly split in each fold with 90% for training and 10% for testing. The results are presented in Supplementary Table S3. Observing the first roll it is possible to find the overall results, we can highlight the maximum testing MSE is considerably high if compared to the minimum testing MSE obtained. This variability indicates that the model's performance is sensitive to the choice of nuclides in the training and testing subsets. After we investigated each fold result, we identified that Fold #1 is responsible for the worse performance in terms of MSE, due to the inclusion of the tritium ( ${}^3\text{H}$ )

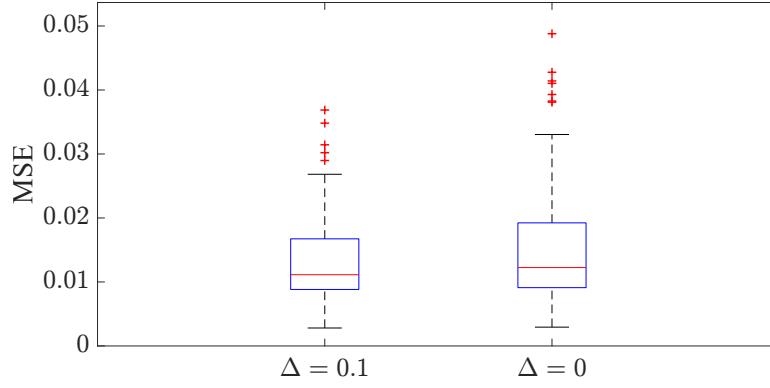

**Supplementary Figure S3.** Box plot illustrating the comparison of the performance over 100 runs using  $\Delta = 0.1$  and  $\Delta = 0$  on  $\text{cf-r}$  in the matter of minimizing the MSE for the reduced size group of stable and long-lived nuclides (training subset of Dataset 1). It is possible to notice that using  $\Delta = 0.1$  not only produced a better minimum MSE, but its variability is smaller too, according to the interquartile range, and the median value of the results is smaller as well.

in the testing subset. The average absolute residual of the tritium on the 100 runs is 18.970 MeV, compared to the average absolute residual of  $4.510 \times 10^{-2}$  MeV from the remaining elements in the testing subset during the 100 runs. These results demonstrated how challenging is modeling the features of lighter nuclides like hydrogen and its isotopes.

|             | MSE   | Min                    | Max                    | Mean                   | Std Dev.               |
|-------------|-------|------------------------|------------------------|------------------------|------------------------|
| Overall     | Train | $2.728 \times 10^{-3}$ | $1.266 \times 10^{-1}$ | $1.639 \times 10^{-2}$ | $1.190 \times 10^{-2}$ |
|             | Test  | $3.886 \times 10^{-4}$ | $8.017 \times 10^4$    | $8.302 \times 10^1$    | $2.535 \times 10^3$    |
| Fold #1     | Train | $4.160 \times 10^{-3}$ | $3.317 \times 10^{-2}$ | $1.175 \times 10^{-2}$ | $5.097 \times 10^{-3}$ |
|             | Test  | $2.337 \times 10^{-3}$ | $8.017 \times 10^4$    | $8.290 \times 10^2$    | $8.015 \times 10^3$    |
| Other folds | Train | $2.728 \times 10^{-3}$ | $1.266 \times 10^{-1}$ | $1.691 \times 10^{-2}$ | $1.232 \times 10^{-2}$ |
|             | Test  | $3.886 \times 10^{-4}$ | 1.937                  | $1.310 \times 10^{-1}$ | $3.151 \times 10^{-1}$ |

**Supplementary Table S3.** Statistical analysis in terms of MSE of the 10-fold cross-validation using a reduced size group of stable and long-lived nuclides of the nuclear chart present in Dataset 1. We present the overall result and specifically the results from the Fold #1 and the remaining 9 folds results, which performed 100 runs using a  $\text{depth}_1$  CF. It is noticeable that the maximum overall MSE value is considerably higher than the minimum overall MSE value, contributing to an increase in the overall average MSE value. Investigating each fold result shows that fold #1 is responsible for the worse performance in terms of MSE, due to the inclusion of the tritium ( ${}^3\text{H}$ ) in the testing subset. The average absolute residual of the tritium on the 100 runs is 18.970 MeV, compared to the average absolute residual of  $4.510 \times 10^{-2}$  MeV from the remaining elements in the testing subset during the 100 runs. This demonstrates how challenging is modeling the features of lighter nuclides like hydrogen and its isotopes.

## For Dataset 2

The initial investigation is over the use of sample weight to enhance the performance of our method on a specific region. The expression used to evaluate the weight used for each nuclide in the loss function  $\ell_{\text{Pen}}$  is described in Section 'Results'. We employed a  $\text{depth}_1$  CF for the training and testing subsets of Dataset 2.

Supplementary Table S4 shows the statistical analysis in terms of MSE of experiments exploring different scenarios, each performing 100 runs. Starting from left to right, in the first four columns we show the information from the experiments covering the whole dataset and not using sample weight to enhance the performance on lighter nuclides. Bringing more attention to the two columns in the center, they detail the results focusing on nuclides with  $A \geq 200$ . Apparently, our method delivers better models for heavier nuclides of the nuclear chart, this is demonstrated when comparing the statistical indicators from the two columns in the center and the first two columns showing the results for all nuclides. The last two columns show the information from the experiment using sample weight to enhance the performance on lighter nuclides. It is possible to verify a small improvement comparing the minimum value obtained using and not using sample weight. However, the remaining statistical indicators point to the fact that the overall performance deteriorates.

| MSE      | No Sample Weight       |                        |                            |                        | Sample Weight          |                        |
|----------|------------------------|------------------------|----------------------------|------------------------|------------------------|------------------------|
|          | Dataset 2              |                        | Dataset 2 ( $A \geq 200$ ) |                        | Dataset 2              |                        |
|          | Train                  | Test                   | Train                      | Test                   | Train                  | Test                   |
| Min      | $3.190 \times 10^{-2}$ | $1.495 \times 10^{-1}$ | $1.541 \times 10^{-3}$     | $1.020 \times 10^{-3}$ | $3.121 \times 10^{-2}$ | $3.049 \times 10^{-2}$ |
| Max      | $4.149 \times 10^{-2}$ | $1.765 \times 10^{-1}$ | $1.677 \times 10^{-3}$     | $3.124 \times 10^{-3}$ | $3.714 \times 10^{-1}$ | $8.738 \times 10^{-1}$ |
| Mean     | $3.603 \times 10^{-2}$ | $1.598 \times 10^{-1}$ | $1.642 \times 10^{-3}$     | $2.545 \times 10^{-3}$ | $1.366 \times 10^{-1}$ | $3.081 \times 10^{-1}$ |
| Std Dev. | $4.229 \times 10^{-3}$ | $1.238 \times 10^{-2}$ | $6.724 \times 10^{-5}$     | $1.022 \times 10^{-3}$ | $7.969 \times 10^{-2}$ | $1.427 \times 10^{-1}$ |

**Supplementary Table S4.** Statistical analysis of the results in terms of MSE from 100 runs using *cf-r* and a *depth*<sub>1</sub> CF for the stable and unstable nuclides experimentally observed with  $A \geq 8$  (training subset of Dataset 2) and unstable nuclides with estimated values (testing subset of Dataset 2) from the AME2020. In the first four columns from left to right, we show the information from the experiment covering the whole dataset and not using sample weight to enhance the performance on lighter nuclides. The two columns in the center detail the results focusing on nuclides with  $A \geq 200$ . Apparently, our method delivers better models for heavier nuclides, this is demonstrated when comparing the statistical indicators from the two columns in the center and the first two columns showing the results for all nuclides. The last two columns show the information from the experiment using sample weight. It is possible to verify a small improvement comparing the minimum value obtained using and not using sample weight. However, the remaining statistical indicators point to the fact that the overall performance deteriorates.

To illustrate the findings described in Supplementary Table S4 we used a box plot represented in Supplementary Fig. S4. This plot illustrates that although using sample weighting reduced the minimum MSE obtained, the average performance was significantly worse. This fact is supported by observing the interquartile range of both approaches and also the distance of the worst result obtained.

Following the methodology described, we performed a 10-fold cross-validation using the experimentally observed nuclides (training subset) of Dataset 2 to demonstrate the robustness of our results obtained and to identify the presence of nuclides more difficult to model, as it was verified in Dataset 1.

The nuclides were randomly split in each fold with 90% for training and 10% for testing. According to the statistical analysis shown in Supplementary Table S4 that demonstrated a decrease in the performance when using sample weight, we have not used sample weight in the 10-fold cross-validation. The results are presented in Supplementary Table S5.

The statistical analysis shows consistency between the results reported in Supplementary Table S4 and the results reported in Supplementary Table S5. The fact that Dataset 2 includes nuclides with  $A \geq 8$  and excludes lighter nuclides with different behavior benefits the modeling task. We can also verify that there are no specific experimentally observed nuclides deteriorating the performance of our method in Dataset 2, rather than reported in Supplementary Table S3 for the tritium in Dataset 1.

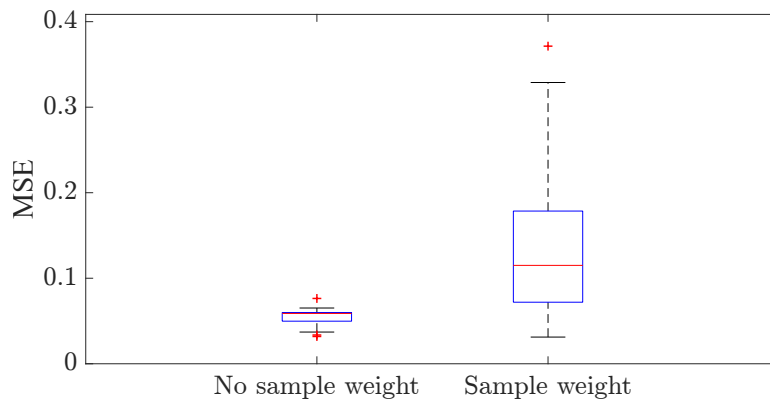

**Supplementary Figure S4.** Box plot illustrating the performance difference over the experimentally observed NBE values with  $A \geq 8$  (training subset) and estimated values of NBE (testing subset). We analysed two distinct scenarios on *cf-r* in the matter of MSE, first not using weight on each sample (left) and second, using a weight for each sample and applying the loss function  $\ell_{Pen}$  (right). This plot demonstrates that although using sample weighting produced the best model, the average performance was significantly worse. This fact is supported by observing the interquartile range of both approaches and also the distance of the worst result obtained.

|     | Subset | Min                    | Max                    | Mean                   | Std Dev.               |
|-----|--------|------------------------|------------------------|------------------------|------------------------|
| MSE | Train  | $1.225 \times 10^{-2}$ | $8.860 \times 10^{-2}$ | $5.516 \times 10^{-2}$ | $8.990 \times 10^{-3}$ |
|     | Test   | $9.519 \times 10^{-3}$ | $8.413 \times 10^{-1}$ | $5.948 \times 10^{-2}$ | $3.537 \times 10^{-2}$ |

**Supplementary Table S5.** Statistical analysis in terms of MSE of the 10-fold cross-validation employing 90%/10% train/test rate of only the experimentally observed values of NBE of stable and unstable nuclides with  $A \geq 8$  (training subset of Dataset 2). The statistical analysis shows consistency with the results reported in Supplementary Table S4. The fact that just nuclides with  $A \geq 8$  are used, excluding lighter nuclides with different behavior, benefits the modeling task. We can also verify that there are no specific experimentally observed nuclides deteriorating the performance of our method in the group of experimentally observed values of NBE of stable and unstable nuclides with  $A \geq 8$ , rather than reported in Supplementary Table S3 for the stable and long-lived nuclides including those with  $A < 8$ .

## Newton's Optimisation Method

We explore an approach to finding a solution for a problem based on the Newton-Raphson method. In the original method, we aim to find the root  $x$  of a function such that  $f(x) = 0$ . From this perspective, the optimisation method defines  $g(x) = f'(x)$  according to the condition that the optimal value  $x^*$  satisfies either  $g(x)$  and  $f'(x)$  as  $g(x^*) = f'(x^*) = 0$ <sup>38–40</sup>.

Considering a continuously differentiable function, the derivative can be evaluated and the optimisation problem can be expressed as a root-finding problem. In the case of a single variable function, Newton's method procedure to update the solution is defined as,

$$x_{k+1} = x_k - \frac{f'(x_k)}{f''(x_k)}, \quad (\text{S6})$$

where  $k$  is the current iteration and,  $f'(\cdot)$  and  $f''(\cdot)$  are the first and second derivative, respectively.

Supplementary Eq. (S6) can be adapted to a multi-variable function in the form of,

$$x_{k+1} = x_k - \nabla^2 f(x_k)^{-1} \nabla f(x_k), \quad (\text{S7})$$

where  $\nabla^2 f(x_k)$  is Hessian matrix and  $\nabla f(x_k)$  is the Gradient matrix.



## Description of the Nuclides included in Dataset 1

| Nucleus        | Z  | A  | N  | B/A (EXP, MeV) 2020 | Nucleus         | Z  | A   | N   | B/A (EXP, MeV) 2020 |
|----------------|----|----|----|---------------------|-----------------|----|-----|-----|---------------------|
| H <sup>a</sup> | 1  | 3  | 2  | 2.827265            | Ru              | 44 | 100 | 56  | 8.619359            |
| He             | 2  | 4  | 2  | 7.073916            | Ru              | 44 | 101 | 57  | 8.601366            |
| Li             | 3  | 6  | 3  | 5.332331            | Rh              | 45 | 103 | 58  | 8.584193            |
| Li             | 3  | 7  | 4  | 5.60644             | Pd              | 46 | 105 | 59  | 8.570651            |
| Be             | 4  | 9  | 5  | 6.462669            | Pd              | 46 | 106 | 60  | 8.579993            |
| B              | 5  | 10 | 5  | 6.475084            | Ag              | 47 | 107 | 60  | 8.553901            |
| B              | 5  | 11 | 6  | 6.927732            | Cd              | 48 | 110 | 62  | 8.551276            |
| C              | 6  | 12 | 6  | 7.680145            | Cd              | 48 | 111 | 63  | 8.53708             |
| C              | 6  | 13 | 7  | 7.46985             | In              | 49 | 113 | 64  | 8.52293             |
| N              | 7  | 14 | 7  | 7.475615            | Sn              | 50 | 115 | 65  | 8.51407             |
| N              | 7  | 15 | 8  | 7.69946             | Sn              | 50 | 116 | 66  | 8.523117            |
| O              | 8  | 16 | 8  | 7.976207            | Sb              | 51 | 121 | 70  | 8.482057            |
| O              | 8  | 17 | 9  | 7.750729            | Te              | 52 | 122 | 70  | 8.478132            |
| F              | 9  | 19 | 10 | 7.779019            | I               | 53 | 127 | 74  | 8.445482            |
| Ne             | 10 | 21 | 11 | 7.971714            | Xe              | 54 | 126 | 72  | 8.443538            |
| Na             | 11 | 23 | 12 | 8.111494            | Cs              | 55 | 133 | 78  | 8.409979            |
| Mg             | 12 | 25 | 13 | 8.223503            | Ba              | 56 | 132 | 76  | 8.409375            |
| Mg             | 12 | 26 | 14 | 8.333871            | Ba              | 56 | 134 | 78  | 8.408173            |
| Al             | 13 | 27 | 14 | 8.331553            | La <sup>a</sup> | 57 | 138 | 81  | 8.375084            |
| Si             | 14 | 29 | 15 | 8.448636            | La              | 57 | 139 | 82  | 8.377999            |
| Si             | 14 | 30 | 16 | 8.520655            | Ce              | 58 | 138 | 80  | 8.377041            |
| P              | 15 | 31 | 16 | 8.481168            | Pr              | 59 | 141 | 82  | 8.353985            |
| S              | 16 | 34 | 18 | 8.583499            | Nd              | 60 | 143 | 83  | 8.330489            |
| Cl             | 17 | 37 | 20 | 8.570282            | Nd <sup>a</sup> | 60 | 144 | 84  | 8.326924            |
| Ar             | 18 | 38 | 20 | 8.614281            | Sm              | 62 | 149 | 87  | 8.263468            |
| K              | 19 | 41 | 22 | 8.576073            | Sm              | 62 | 150 | 88  | 8.261624            |
| Ca             | 20 | 43 | 23 | 8.600665            | Eu              | 63 | 153 | 90  | 8.228701            |
| Sc             | 21 | 45 | 24 | 8.618941            | Gd              | 64 | 155 | 91  | 8.213254            |
| Ti             | 22 | 47 | 25 | 8.661233            | Gd              | 64 | 156 | 92  | 8.215325            |
| Ti             | 22 | 48 | 26 | 8.723012            | Tb              | 65 | 159 | 94  | 8.188803            |
| V <sup>a</sup> | 23 | 50 | 27 | 8.695903            | Dy              | 66 | 160 | 94  | 8.184053            |
| Cr             | 24 | 52 | 28 | 8.775995            | Dy              | 66 | 161 | 95  | 8.173309            |
| Mn             | 25 | 55 | 30 | 8.765025            | Ho              | 67 | 165 | 98  | 8.146959            |
| Fe             | 26 | 56 | 30 | 8.790356            | Er              | 68 | 167 | 99  | 8.131735            |
| Fe             | 26 | 57 | 31 | 8.770283            | Tm              | 69 | 169 | 100 | 8.11447             |
| Co             | 27 | 59 | 32 | 8.768038            | Yb              | 70 | 173 | 103 | 8.087428            |
| Ni             | 28 | 61 | 33 | 8.765028            | Lu <sup>a</sup> | 71 | 176 | 105 | 8.059021            |
| Cu             | 29 | 63 | 34 | 8.75214             | Hf              | 72 | 179 | 107 | 8.038547            |
| Cu             | 29 | 65 | 36 | 8.757097            | Hf              | 72 | 180 | 108 | 8.034932            |
| Zn             | 30 | 66 | 36 | 8.759634            | Ta              | 73 | 181 | 108 | 8.023405            |
| Ga             | 31 | 69 | 38 | 8.72458             | W               | 74 | 186 | 112 | 7.988603            |
| Ge             | 32 | 70 | 38 | 8.721703            | Re <sup>a</sup> | 75 | 187 | 112 | 7.977952            |

| Nucleus | Z  | A  | N  | B/A (EXP, MeV) 2020 | Nucleus         | Z  | A   | N   | B/A (EXP, MeV) 2020 |
|---------|----|----|----|---------------------|-----------------|----|-----|-----|---------------------|
| As      | 33 | 75 | 42 | 8.700875            | Os              | 76 | 192 | 116 | 7.948526            |
| Se      | 34 | 76 | 42 | 8.711478            | Ir              | 77 | 193 | 116 | 7.938135            |
| Br      | 35 | 79 | 44 | 8.687596            | Pt              | 78 | 198 | 120 | 7.914151            |
| Kr      | 36 | 80 | 44 | 8.69293             | Au              | 79 | 197 | 118 | 7.915655            |
| Rb      | 37 | 85 | 48 | 8.697442            | Hg              | 80 | 204 | 124 | 7.885546            |
| Sr      | 38 | 84 | 46 | 8.677513            | Tl              | 81 | 205 | 124 | 7.878395            |
| Sr      | 38 | 86 | 48 | 8.708457            | Pb              | 82 | 208 | 126 | 7.867453            |
| Sr      | 38 | 88 | 50 | 8.732596            | Bi <sup>a</sup> | 83 | 209 | 126 | 7.847987            |
| Y       | 39 | 89 | 50 | 8.714011            | Th <sup>a</sup> | 90 | 232 | 142 | 7.615034            |
| Zr      | 40 | 90 | 50 | 8.70997             | U <sup>a</sup>  | 92 | 234 | 142 | 7.600716            |
| Nb      | 41 | 93 | 52 | 8.664185            | U <sup>a</sup>  | 92 | 235 | 143 | 7.590915            |
| Mo      | 42 | 94 | 52 | 8.662334            | U <sup>a</sup>  | 92 | 238 | 146 | 7.570126            |
| Mo      | 42 | 95 | 53 | 8.648721            |                 |    |     |     |                     |

<sup>a</sup> Isotope not considered *stable*.

**Supplementary Table S6.** Details of the training subset of Dataset 1, showing the atomic number  $Z$ , atomic mass  $A$ , number of neutrons  $N$ , and the experimentally (EXP) observed value of the nuclear binding energy per nucleon  $B/A$  for the stable nuclides with the inclusion of tritium and other long-lived isotopes. (NuDat and AME2020<sup>5</sup>)

| Element                  | Half-life                   | Element                  | Half-life               |
|--------------------------|-----------------------------|--------------------------|-------------------------|
| ${}^3_1\text{H}$         | 12.32 y*                    | ${}^{187}_{75}\text{Re}$ | $4.33 \times 10^{10}$ y |
| ${}^{50}_{23}\text{V}$   | $2.1 \times 10^{17}$ y      | ${}^{209}_{83}\text{Bi}$ | $2.01 \times 10^{19}$ y |
| ${}^{132}_{56}\text{Ba}$ | $3.0 \times 10^{21}$ y      | ${}^{232}_{90}\text{Th}$ | $1.4 \times 10^{10}$ y  |
| ${}^{138}_{57}\text{La}$ | $1.02 \times 10^{11}$ y     | ${}^{234}_{92}\text{U}$  | $2.455 \times 10^5$ y   |
| ${}^{138}_{58}\text{Ce}$ | $\geq 0.9 \times 10^{14}$ y | ${}^{235}_{92}\text{U}$  | $7.04 \times 10^8$ y    |
| ${}^{144}_{60}\text{Nd}$ | $2.29 \times 10^{15}$ y     | ${}^{238}_{92}\text{U}$  | $4.468 \times 10^9$ y   |
| ${}^{176}_{71}\text{Lu}$ | $3.76 \times 10^{10}$ y     |                          |                         |

\* Measured value.

**Supplementary Table S7.** Nuclides not considered stable included in Dataset 1. All these nuclides are long-lived isotopes, with the exception of tritium (included due to its different physical properties). Half-lives obtained from NuDat and AME2020<sup>5</sup> are estimated, with the exception of tritium.

## Description of the Stable Nuclides According to IAEA

| Nucleus | Z  | A  | N  | B/A (EXP, MeV) 2020 | Nucleus | Z  | A   | N  | B/A (EXP, MeV) 2020 |
|---------|----|----|----|---------------------|---------|----|-----|----|---------------------|
| H       | 1  | 2  | 1  | 1.112283            | Pd      | 46 | 110 | 64 | 8.547163            |
| He      | 2  | 3  | 1  | 2.572680            | Ag      | 47 | 107 | 60 | 8.553901            |
| He      | 2  | 4  | 2  | 7.073916            | Ag      | 47 | 109 | 62 | 8.547916            |
| Li      | 3  | 6  | 3  | 5.332331            | Cd      | 48 | 106 | 58 | 8.539049            |
| Li      | 3  | 7  | 4  | 5.606440            | Cd      | 48 | 108 | 60 | 8.550020            |
| Be      | 4  | 9  | 5  | 6.462669            | Cd      | 48 | 110 | 62 | 8.551275            |
| B       | 5  | 10 | 5  | 6.475084            | Cd      | 48 | 111 | 63 | 8.537080            |
| B       | 5  | 11 | 6  | 6.927732            | Cd      | 48 | 112 | 64 | 8.544731            |
| C       | 6  | 12 | 6  | 7.680145            | Cd      | 48 | 114 | 66 | 8.531514            |
| C       | 6  | 13 | 7  | 7.469849            | In      | 49 | 113 | 64 | 8.522930            |
| N       | 7  | 14 | 7  | 7.475615            | Sn      | 50 | 112 | 62 | 8.513619            |
| N       | 7  | 15 | 8  | 7.699460            | Sn      | 50 | 114 | 64 | 8.522567            |
| O       | 8  | 16 | 8  | 7.976207            | Sn      | 50 | 115 | 65 | 8.514070            |
| O       | 8  | 17 | 9  | 7.750729            | Sn      | 50 | 116 | 66 | 8.523117            |
| O       | 8  | 18 | 10 | 7.767098            | Sn      | 50 | 117 | 67 | 8.509612            |
| F       | 9  | 19 | 10 | 7.779019            | Sn      | 50 | 118 | 68 | 8.516534            |
| Ne      | 10 | 20 | 10 | 8.032241            | Sn      | 50 | 119 | 69 | 8.499449            |
| Ne      | 10 | 21 | 11 | 7.971714            | Sn      | 50 | 120 | 70 | 8.504488            |
| Ne      | 10 | 22 | 12 | 8.080466            | Sn      | 50 | 122 | 72 | 8.487897            |
| Na      | 11 | 23 | 12 | 8.111494            | Sn      | 50 | 124 | 74 | 8.467400            |
| Mg      | 12 | 24 | 12 | 8.260710            | Sb      | 51 | 121 | 70 | 8.482057            |
| Mg      | 12 | 25 | 13 | 8.223503            | Sb      | 51 | 123 | 72 | 8.472320            |
| Mg      | 12 | 26 | 14 | 8.333871            | Te      | 52 | 120 | 68 | 8.476986            |
| Al      | 13 | 27 | 14 | 8.331553            | Te      | 52 | 122 | 70 | 8.478131            |
| Si      | 14 | 28 | 14 | 8.447745            | Te      | 52 | 124 | 72 | 8.473270            |
| Si      | 14 | 29 | 15 | 8.448636            | Te      | 52 | 125 | 73 | 8.458036            |
| Si      | 14 | 30 | 16 | 8.520655            | Te      | 52 | 126 | 74 | 8.463240            |
| P       | 15 | 31 | 16 | 8.481168            | I       | 53 | 127 | 74 | 8.445482            |
| S       | 16 | 32 | 16 | 8.493130            | Xe      | 54 | 126 | 72 | 8.443537            |
| S       | 16 | 33 | 17 | 8.497630            | Xe      | 54 | 128 | 74 | 8.443301            |
| S       | 16 | 34 | 18 | 8.583499            | Xe      | 54 | 129 | 75 | 8.431390            |
| S       | 16 | 36 | 20 | 8.575390            | Xe      | 54 | 130 | 76 | 8.437731            |
| Cl      | 17 | 35 | 18 | 8.520279            | Xe      | 54 | 131 | 77 | 8.423737            |
| Cl      | 17 | 37 | 20 | 8.570282            | Xe      | 54 | 132 | 78 | 8.427623            |
| Ar      | 18 | 36 | 18 | 8.519910            | Cs      | 55 | 133 | 78 | 8.409979            |
| Ar      | 18 | 38 | 20 | 8.614281            | Ba      | 56 | 130 | 74 | 8.405513            |
| Ar      | 18 | 40 | 22 | 8.595259            | Ba      | 56 | 134 | 78 | 8.408173            |
| K       | 19 | 39 | 20 | 8.557026            | Ba      | 56 | 135 | 79 | 8.397535            |
| K       | 19 | 41 | 22 | 8.576073            | Ba      | 56 | 136 | 80 | 8.402757            |
| Ca      | 20 | 40 | 20 | 8.551305            | Ba      | 56 | 137 | 81 | 8.391829            |
| Ca      | 20 | 42 | 22 | 8.616565            | Ba      | 56 | 138 | 82 | 8.393422            |
| Ca      | 20 | 43 | 23 | 8.600665            | La      | 57 | 139 | 82 | 8.377999            |

| Nucleus | Z  | A  | N  | B/A (EXP, MeV) 2020 | Nucleus | Z  | A   | N   | B/A (EXP, MeV) 2020 |
|---------|----|----|----|---------------------|---------|----|-----|-----|---------------------|
| Ca      | 20 | 44 | 24 | 8.658177            | Ce      | 58 | 136 | 78  | 8.373762            |
| Ca      | 20 | 46 | 26 | 8.668985            | Ce      | 58 | 140 | 82  | 8.376304            |
| Sc      | 21 | 45 | 24 | 8.618941            | Pr      | 59 | 141 | 82  | 8.353985            |
| Ti      | 22 | 46 | 24 | 8.656462            | Nd      | 60 | 142 | 82  | 8.346031            |
| Ti      | 22 | 47 | 25 | 8.661233            | Nd      | 60 | 143 | 83  | 8.330489            |
| Ti      | 22 | 48 | 26 | 8.723012            | Nd      | 60 | 145 | 85  | 8.309188            |
| Ti      | 22 | 49 | 27 | 8.711163            | Nd      | 60 | 146 | 86  | 8.304093            |
| Ti      | 22 | 50 | 28 | 8.755723            | Nd      | 60 | 148 | 88  | 8.277178            |
| V       | 23 | 51 | 28 | 8.742085            | Sm      | 62 | 144 | 82  | 8.303680            |
| Cr      | 24 | 52 | 28 | 8.775995            | Sm      | 62 | 149 | 87  | 8.263468            |
| Cr      | 24 | 53 | 29 | 8.760210            | Sm      | 62 | 150 | 88  | 8.261624            |
| Cr      | 24 | 54 | 30 | 8.777967            | Sm      | 62 | 152 | 90  | 8.244065            |
| Mn      | 25 | 55 | 30 | 8.765025            | Sm      | 62 | 154 | 92  | 8.226838            |
| Fe      | 26 | 54 | 28 | 8.736385            | Eu      | 63 | 153 | 90  | 8.228701            |
| Fe      | 26 | 56 | 30 | 8.790356            | Gd      | 64 | 154 | 90  | 8.224800            |
| Fe      | 26 | 57 | 31 | 8.770283            | Gd      | 64 | 155 | 91  | 8.213254            |
| Fe      | 26 | 58 | 32 | 8.792253            | Gd      | 64 | 156 | 92  | 8.215325            |
| Co      | 27 | 59 | 32 | 8.768038            | Gd      | 64 | 157 | 93  | 8.203507            |
| Ni      | 28 | 58 | 30 | 8.732062            | Gd      | 64 | 158 | 94  | 8.201823            |
| Ni      | 28 | 60 | 32 | 8.780777            | Gd      | 64 | 160 | 96  | 8.183017            |
| Ni      | 28 | 61 | 33 | 8.765028            | Tb      | 65 | 159 | 94  | 8.188802            |
| Ni      | 28 | 62 | 34 | 8.794555            | Dy      | 66 | 156 | 90  | 8.192437            |
| Ni      | 28 | 64 | 36 | 8.777464            | Dy      | 66 | 158 | 92  | 8.190130            |
| Cu      | 29 | 63 | 34 | 8.752140            | Dy      | 66 | 160 | 94  | 8.184053            |
| Cu      | 29 | 65 | 36 | 8.757097            | Dy      | 66 | 161 | 95  | 8.173309            |
| Zn      | 30 | 64 | 34 | 8.735906            | Dy      | 66 | 162 | 96  | 8.173455            |
| Zn      | 30 | 66 | 36 | 8.759633            | Dy      | 66 | 163 | 97  | 8.161784            |
| Zn      | 30 | 67 | 37 | 8.734153            | Dy      | 66 | 164 | 98  | 8.158713            |
| Zn      | 30 | 68 | 38 | 8.755682            | Ho      | 67 | 165 | 98  | 8.146959            |
| Ga      | 31 | 69 | 38 | 8.724580            | Er      | 68 | 162 | 94  | 8.152396            |
| Ga      | 31 | 71 | 40 | 8.717605            | Er      | 68 | 164 | 96  | 8.149019            |
| Ge      | 32 | 70 | 38 | 8.721703            | Er      | 68 | 166 | 98  | 8.141948            |
| Ge      | 32 | 72 | 40 | 8.731746            | Er      | 68 | 167 | 99  | 8.131735            |
| Ge      | 32 | 73 | 41 | 8.705050            | Er      | 68 | 168 | 100 | 8.129590            |
| Ge      | 32 | 74 | 42 | 8.725201            | Er      | 68 | 170 | 102 | 8.111953            |
| Ge      | 32 | 76 | 44 | 8.705236            | Tm      | 69 | 169 | 100 | 8.114470            |
| As      | 33 | 75 | 42 | 8.700875            | Yb      | 70 | 168 | 98  | 8.111887            |
| Se      | 34 | 74 | 40 | 8.687715            | Yb      | 70 | 170 | 100 | 8.106610            |
| Se      | 34 | 76 | 42 | 8.711478            | Yb      | 70 | 171 | 101 | 8.097883            |
| Se      | 34 | 77 | 43 | 8.694691            | Yb      | 70 | 172 | 102 | 8.097430            |
| Se      | 34 | 78 | 44 | 8.717807            | Yb      | 70 | 173 | 103 | 8.087428            |
| Se      | 34 | 80 | 46 | 8.710814            | Yb      | 70 | 174 | 104 | 8.083848            |
| Br      | 35 | 79 | 44 | 8.687596            | Yb      | 70 | 176 | 106 | 8.064085            |

| Nucleus | Z  | A   | N  | B/A (EXP, MeV) 2020 | Nucleus | Z  | A   | N   | B/A (EXP, MeV) 2020 |
|---------|----|-----|----|---------------------|---------|----|-----|-----|---------------------|
| Br      | 35 | 81  | 46 | 8.695946            | Lu      | 71 | 175 | 104 | 8.069141            |
| Kr      | 36 | 78  | 42 | 8.661238            | Hf      | 72 | 176 | 104 | 8.061360            |
| Kr      | 36 | 80  | 44 | 8.692930            | Hf      | 72 | 177 | 105 | 8.051837            |
| Kr      | 36 | 82  | 46 | 8.710675            | Hf      | 72 | 178 | 106 | 8.049444            |
| Kr      | 36 | 83  | 47 | 8.695730            | Hf      | 72 | 179 | 107 | 8.038547            |
| Kr      | 36 | 84  | 48 | 8.717447            | Hf      | 72 | 180 | 108 | 8.034932            |
| Kr      | 36 | 86  | 50 | 8.712029            | Ta      | 73 | 181 | 108 | 8.023405            |
| Rb      | 37 | 85  | 48 | 8.697442            | W       | 74 | 182 | 108 | 8.018310            |
| Sr      | 38 | 84  | 46 | 8.677513            | W       | 74 | 184 | 110 | 8.005078            |
| Sr      | 38 | 86  | 48 | 8.708457            | W       | 74 | 186 | 112 | 7.988603            |
| Sr      | 38 | 87  | 49 | 8.705236            | Re      | 75 | 185 | 110 | 7.991010            |
| Sr      | 38 | 88  | 50 | 8.732596            | Os      | 76 | 187 | 111 | 7.973781            |
| Y       | 39 | 89  | 50 | 8.714011            | Os      | 76 | 188 | 112 | 7.973866            |
| Zr      | 40 | 90  | 50 | 8.709970            | Os      | 76 | 189 | 113 | 7.963003            |
| Zr      | 40 | 91  | 51 | 8.693315            | Os      | 76 | 190 | 114 | 7.962105            |
| Zr      | 40 | 92  | 52 | 8.692678            | Os      | 76 | 192 | 116 | 7.948526            |
| Zr      | 40 | 94  | 54 | 8.666802            | Ir      | 77 | 191 | 114 | 7.948114            |
| Nb      | 41 | 93  | 52 | 8.664185            | Ir      | 77 | 193 | 116 | 7.938135            |
| Mo      | 42 | 92  | 50 | 8.657731            | Pt      | 78 | 192 | 114 | 7.942492            |
| Mo      | 42 | 94  | 52 | 8.662334            | Pt      | 78 | 194 | 116 | 7.935942            |
| Mo      | 42 | 95  | 53 | 8.648721            | Pt      | 78 | 195 | 117 | 7.926553            |
| Mo      | 42 | 96  | 54 | 8.653988            | Pt      | 78 | 196 | 118 | 7.926530            |
| Mo      | 42 | 97  | 55 | 8.635093            | Pt      | 78 | 198 | 120 | 7.914151            |
| Mo      | 42 | 98  | 56 | 8.635169            | Au      | 79 | 197 | 118 | 7.915655            |
| Ru      | 44 | 96  | 52 | 8.609413            | Hg      | 80 | 196 | 116 | 7.914370            |
| Ru      | 44 | 98  | 54 | 8.620314            | Hg      | 80 | 198 | 118 | 7.911553            |
| Ru      | 44 | 99  | 55 | 8.608713            | Hg      | 80 | 199 | 119 | 7.905279            |
| Ru      | 44 | 100 | 56 | 8.619359            | Hg      | 80 | 200 | 120 | 7.905896            |
| Ru      | 44 | 101 | 57 | 8.601366            | Hg      | 80 | 201 | 121 | 7.897561            |
| Ru      | 44 | 102 | 58 | 8.607428            | Hg      | 80 | 202 | 122 | 7.896851            |
| Ru      | 44 | 104 | 60 | 8.587400            | Hg      | 80 | 204 | 124 | 7.885546            |
| Rh      | 45 | 103 | 58 | 8.584193            | Tl      | 81 | 203 | 122 | 7.886053            |
| Pd      | 46 | 102 | 56 | 8.580289            | Tl      | 81 | 205 | 124 | 7.878395            |
| Pd      | 46 | 104 | 58 | 8.584848            | Pb      | 82 | 206 | 124 | 7.875362            |
| Pd      | 46 | 105 | 59 | 8.570651            | Pb      | 82 | 207 | 125 | 7.869866            |
| Pd      | 46 | 106 | 60 | 8.579993            | Pb      | 82 | 208 | 126 | 7.867453            |
| Pd      | 46 | 108 | 62 | 8.567024            |         |    |     |     |                     |

**Supplementary Table S8.** Details of the stable nuclides defined by IAEA. The table shows the atomic number  $Z$ , atomic mass  $A$ , number of neutrons  $N$ , and the experimentally (EXP) observed value of the nuclear binding energy per nucleon  $B/A$ . (AME2020<sup>5</sup> and NuDat).
